# Supplementary material for: Zn(OTf)2-catalyzed addition of amines to carbodiimides: efficient synthesis of guanidines and unpredicted formation of Zn–N amido species
Source: Royal Society of Chemistry journal article supplement (doi:10.1039/b923249b), 2010-01-01

## *Cover Page for Supporting Information*

### *Manuscript Title:*

Zn(OTf)<sub>2</sub>-catalyzed addition of amines to carbodiimides: efficient synthesis of guanidines and unpredicted formation of Zn–N amido species

### *Authors:*

Dongzhen Li, Jie Guang, Wen-Xiong Zhang,\* Yang Wang and Zhenfeng Xi\*

### *Affiliations:*

Beijing National Laboratory for Molecular Sciences (BNLMS), Key Laboratory of Bioorganic Chemistry and Molecular Engineering of Ministry of Education, College of Chemistry, Peking University, Beijing 100871, China; State Key Laboratory of Elemento-Organic Chemistry, Nankai University, Tianjin, 300071, China. Fax: 86 10 62751708; Tel: 86 10 62758294; E-mail: wx\_zhang@pku.edu.cn

### *Contents:*

|                                                                                      |           |
|--------------------------------------------------------------------------------------|-----------|
| 1) Characterization Data                                                             | <b>S1</b> |
| 2) An alternative mechanism for the formation of guanidines                          | <b>S4</b> |
| 3) X-ray crystallographic studies for <b>20</b> and <b>22</b>                        | <b>S4</b> |
| ➤ <b>SFig. 1</b> ORTEP drawing of <b>20</b> with 30% thermal ellipsoids.             | <b>S5</b> |
| ➤ <b>STable 1.</b> Crystal data and structure refinement for <b>20</b> .             | <b>S5</b> |
| ➤ <b>SFig. 2</b> ORTEP drawing of <b>22</b> with 30% thermal ellipsoids.             | <b>S6</b> |
| ➤ <b>STable 2.</b> Crystal data and structure refinement for <b>22</b> .             | <b>S6</b> |
| 4) Copies of <sup>1</sup> H NMR and <sup>13</sup> C NMR spectra of all new compounds | <b>S7</b> |

## 1) Characterization Data

1. Colorless solid, yield 97%.  $^1\text{H}$  NMR (400 MHz,  $\text{C}_6\text{D}_6$ ):  $\delta$  0.91 (d,  $J = 6.4$  Hz, 12H,  $\text{CH}_3$ ), 3.52 (br, 2H, NH), 3.64-3.69 (m, 2H, CH), 6.90 (t,  $J = 7.6$  Hz, 1H,  $p\text{-C}_6\text{H}_5$ ), 7.10 (d,  $J = 7.6$  Hz, 2H,  $o\text{-C}_6\text{H}_5$ ), 7.25 (t,  $J = 7.6$  Hz, 2H,  $m\text{-C}_6\text{H}_5$ ).  $^{13}\text{C}$  NMR (100 MHz,  $\text{C}_6\text{D}_6$ ):  $\delta$  23.4, 43.4, 121.3, 123.7, 129.6, 149.7, 151.6. <sup>1</sup>

2. Colorless solid, yield 96%.  $^1\text{H}$  NMR (300 MHz,  $\text{CDCl}_3$ ):  $\delta$  1.08-2.03 (m, 20H,  $\text{CH}_2$ ), 3.42 (br, 2H, NH), 3.63 (br, 2H, CH), 6.86-7.23 (m, 5H,  $\text{C}_6\text{H}_5$ ).  $^{13}\text{C}$  NMR (75 MHz,  $\text{CDCl}_3$ ):  $\delta$  24.6, 25.3, 33.4, 49.8, 120.9, 123.3, 128.8, 149.6, 150.1. <sup>2</sup>

3. Colorless solid, yield 96%.  $^1\text{H}$  NMR (400 MHz,  $\text{C}_6\text{D}_6$ ):  $\delta$  1.20 (s, 18H,  $\text{CH}_3$ ), 3.67 (br, 2H, NH), 6.92-7.25 (m, 5H,  $\text{C}_6\text{H}_5$ ).  $^{13}\text{C}$  NMR (100 MHz,  $\text{CDCl}_3$ ):  $\delta$  30.0, 50.6, 121.4, 123.5, 129.5, 149.9, 151.5. <sup>3</sup>

4. Colorless solid, yield 91%.  $^1\text{H}$  NMR (300 MHz,  $\text{C}_6\text{D}_6$ ):  $\delta$  4.37-4.47 (m, 4H,  $\text{CH}_2$  and NH), 6.87-7.16 (m, 15H,  $\text{C}_6\text{H}_5$ ).  $^{13}\text{C}$  NMR (75 MHz,  $\text{C}_6\text{D}_6$ ):  $\delta$  46.3, 123.0, 124.4, 127.9, 128.9, 129.0, 130.1, 132.1, 132.2, 136.3, 136.4, 154.6, 154.8. <sup>4</sup>

5. Colorless solid, yield 97%.  $^1\text{H}$  NMR (300 MHz,  $\text{C}_6\text{D}_6$ ):  $\delta$  0.88 (d,  $J = 6.3$  Hz, 12 H,  $\text{CH}_3$ ), 3.26-3.67 (m, 4H, CH and NH), 6.84-7.16 (m, 4H,  $\text{C}_6\text{H}_4$ ).  $^{13}\text{C}$  NMR (75 MHz,  $\text{C}_6\text{D}_6$ ):  $\delta$  23.2, 43.19, 116.1 (d,  $J = 21.6$  Hz), 124.5 (d,  $J = 7.43$  Hz), 147.6 (d,  $J = 2.48$  Hz), 150.0 (d,  $J = 1.28$  Hz), 160.1. <sup>3</sup>

6. Colorless solid, yield 97%.  $^1\text{H}$  NMR (300 MHz,  $\text{C}_6\text{D}_6$ ):  $\delta$  0.78 (d,  $J = 6.3$  Hz, 12H,  $\text{CH}_3$ ), 3.33 (br, 2H, NH), 3.46-3.52 (m, 2H, CH), 6.78-7.11 (m, 4H,  $\text{C}_6\text{H}_4$ ).  $^{13}\text{C}$  NMR (75 MHz,  $\text{C}_6\text{D}_6$ ):  $\delta$  23.3, 43.4, 121.1, 121.9, 123.7, 130.5, 135.0, 149.8, 153.3. <sup>1</sup>

7. Colorless solid, yield 97%.  $^1\text{H}$  NMR (400 MHz,  $\text{C}_6\text{D}_6$ ):  $\delta$  0.86 (d,  $J = 6.4$  Hz, 12H,  $\text{CH}_3$ ), 3.37 (br, 2H, NH), 3.55-3.60 (m, 2H, CH), 6.68-7.31 (m, 4H,  $\text{C}_6\text{H}_4$ ).  $^{13}\text{C}$  NMR (100 MHz,  $\text{C}_6\text{D}_6$ ):  $\delta$  23.3, 43.4, 113.7, 125.4, 132.5, 149.6, 150.7. <sup>1</sup>

8. Colorless solid, yield 95%.  $^1\text{H}$  NMR (400 MHz,  $\text{C}_6\text{D}_6$ ):  $\delta$  0.93 (d,  $J = 6.8$  Hz, 12H,  $\text{CH}_3$ ), 3.32 (br, 2H, NH), 3.59-3.68 (m, 2H, CH), 6.41-7.87 (m, 4H,  $\text{C}_6\text{H}_4$ ).  $^{13}\text{C}$  NMR (100 MHz,  $\text{C}_6\text{D}_6$ ):  $\delta$  23.7, 43.5, 97.3, 122.9, 123.1, 129.3, 139.6, 149.3, 152.6. <sup>1</sup>

9. Colorless solid, yield 96%.  $^1\text{H}$  NMR (300 MHz,  $\text{C}_6\text{D}_6$ ):  $\delta$  0.91 (d,  $J = 6.3$  Hz, 12 H,  $\text{CH}_3$ ), 1.32 (d,  $J = 6.9$  Hz, 6H,  $\text{CH}_3$ ), 3.36-3.63 (m, 5H, CH and NH), 6.94-7.33 (m, 4H,  $\text{C}_6\text{H}_4$ ).  $^{13}\text{C}$  NMR (75 MHz,  $\text{C}_6\text{D}_6$ ):  $\delta$  23.3, 23.4, 28.6, 43.3, 122.1, 123.0, 126.2, 126.7, 142.2, 148.5, 148.8. <sup>3</sup>

10. Colorless solid, yield 94%.  $^1\text{H}$  NMR (300 MHz,  $\text{C}_6\text{D}_6$ ):  $\delta$  0.89 (d,  $J = 6.0$  Hz, 12H,  $\text{CH}_3$ ), 2.82 (s, 1H, CH), 3.54-3.67 (m, 4H, CH and NH), 6.99-7.17 (m, 4H,  $\text{C}_6\text{H}_4$ ).  $^{13}\text{C}$  NMR (75 MHz,  $\text{C}_6\text{D}_6$ ):  $\delta$  23.1, 43.2, 77.2, 84.6, 123.6, 124.6, 125.0, 127.1, 129.6, 150.1, 151.7. <sup>3</sup>

**11.** Colorless solid, yield 97%.  $^1\text{H}$  NMR (300 MHz,  $\text{CDCl}_3$ ):  $\delta$  0.89-1.21 (m, 12H,  $\text{CH}_3$ ), 2.27 (s, 6H, *o*- $\text{CH}_3$ ), 2.30 (s, 3H, *p*- $\text{CH}_3$ ), 3.39 (br, 2H, NH), 4.10 (br, 2H, CH), 6.92 (s, 2H,  $\text{C}_6\text{H}_2$ ).  $^{13}\text{C}$  NMR (75 MHz,  $\text{CDCl}_3$ ):  $\delta$  18.1, 20.7, 23.5, 43.1, 128.7, 130.7, 143.3, 148.0.<sup>5</sup>

**12.** Colorless solid, yield 95%.  $^1\text{H}$  NMR (300 MHz,  $\text{C}_6\text{D}_6$ ):  $\delta$  0.95 (d,  $J = 6.3$  Hz, 12H,  $\text{CH}_3$ ), 3.45 (s, 3H,  $\text{CH}_3$ ), 3.69-3.74 (m, 4H, CH and NH), 6.74-7.17 (m, 4H,  $\text{C}_6\text{H}_4$ ).  $^{13}\text{C}$  NMR (75 MHz,  $\text{C}_6\text{D}_6$ ):  $\delta$  23.3, 43.4, 55.5, 113.1, 122.0, 122.4, 125.0, 140.2, 150.0, 152.8.<sup>6</sup>

**13.** Colorless solid, yield 85%, m. p. 125.3~125.8 °C.  $^1\text{H}$  NMR (300 MHz,  $\text{CDCl}_3$ ):  $\delta$  1.12 (d,  $J = 4.8$  Hz, 12H,  $\text{CH}_3$ ), 3.71 (br, 4H, CH and NH), 6.80-8.06 (m, 4H,  $\text{C}_6\text{H}_4$ ).  $^{13}\text{C}$  NMR (75 MHz,  $\text{CDCl}_3$ ):  $\delta$  22.7, 43.1, 122.0, 125.2, 139.7, 151.0, 158.4. HRMS calcd. for  $\text{C}_{14}\text{H}_{21}\text{N}_4$ : 245.1761, found 245.1757.<sup>2</sup>

**16.** Colorless solid, yield 95%.  $^1\text{H}$  NMR (300 MHz,  $\text{C}_6\text{D}_6$ ):  $\delta$  0.87 (d,  $J = 6.0$  Hz, 12H,  $\text{CH}_3$ ), 1.05 (t,  $J = 7.2$  Hz, 3H,  $\text{CH}_3$ ), 3.55-3.64 (m, 4H, CH, NH), 4.13-4.20 (q,  $J = 6.9$  Hz, 2H,  $\text{CH}_2$ ), 7.06-8.27 (m, 4H,  $\text{C}_6\text{H}_4$ ).  $^{13}\text{C}$  NMR (75 MHz,  $\text{C}_6\text{D}_6$ ):  $\delta$  14.4, 23.1, 43.3, 60.3, 123.2, 131.7, 149.8, 156.6, 166.6.<sup>2</sup>

**17.** white solid, yield 94%.  $^1\text{H}$  NMR (300 MHz,  $\text{DMSO}-d_6$ ):  $\delta$  1.12 (d,  $J = 6.6$  Hz, 24H,  $\text{CH}_3$ ), 3.46 (br, 4H, CH), 3.78 (br, 4H, NH), 6.67 (s,  $\text{C}_6\text{H}_4$ ).  $^{13}\text{C}$  NMR (75 MHz,  $\text{DMSO}-d_6$ ):  $\delta$  22.8, 42.3, 123.3, 145.7, 150.4.<sup>7</sup>

**18.** Colorless solid, yield 95%.  $^1\text{H}$  NMR (300 MHz,  $\text{C}_6\text{D}_6$ ):  $\delta$  0.99 (d,  $J = 6.3$  Hz, 12H,  $\text{CH}_3$ ), 3.73-3.89 (m, 2H, CH), 6.80-8.29 (m, 3H,  $\text{C}_5\text{H}_3\text{N}$ ).  $^{13}\text{C}$  NMR (75 MHz,  $\text{C}_6\text{D}_6$ ):  $\delta$  23.3, 42.6, 78.9, 123.3, 144.5, 151.3, 153.9, 162.7.<sup>1</sup>

**19.** Colorless solid, yield 93%.  $^1\text{H}$  NMR (400 MHz,  $\text{CDCl}_3$ ):  $\delta$  1.23 (d,  $J = 6.4$  Hz, 12H,  $\text{CH}_3$ ), 2.22 (s, 3H,  $\text{CH}_3$ ), 3.87 (br, 2H, CH), 6.08 (s, 1H, CH(thiazolyl)).  $^{13}\text{C}$  NMR (100 MHz,  $\text{CDCl}_3$ ):  $\delta$  17.6, 23.2, 42.6, 102.5, 146.9, 152.4, 175.1.<sup>1</sup>

**19a.** Colorless liquid, yield 94%.  $^1\text{H}$  NMR (300 MHz,  $\text{C}_6\text{D}_6$ ):  $\delta$  1.14 (d,  $J = 6.3$  Hz, 12H,  $\text{CH}_3$ ), 1.48 (t, 4H,  $\text{CH}_2$ ), 3.31 (t, 4H,  $\text{CH}_2$ ), 3.35-3.40 (m, 2H, CH), 7.15 (s, 1H, NH).  $^{13}\text{C}$  NMR (75 MHz,  $\text{C}_6\text{D}_6$ ):  $\delta$  24.8, 25.4, 46.9, 48.3, 153.0.<sup>8</sup>

These data of compounds **1-13** and **16-19** are consistent with those reported.

## References:

- (1) W.-X. Zhang, M. Nishiura and Z. Hou, *Chem. Eur. J.*, 2007, **13**, 4037–4051;
- (2) Q. Li, S. Wang, S. Zhou, G. Yang, X. Zhu and Y. Liu, *J. Org. Chem.*, 2007, **72**, 6763–6767.
- (3) W.-X. Zhang, D. Li, Z. Wang and Z. Xi, *Organometallics*, 2009, **28**, 882–887.
- (4) K. Ramadas, N. Janarthanan and R. Pritha, *Synlett*, 1997, 1053-1054.
- (5) F. Montilla, A. Pastor and A. Galindo, *J. Organomet. Chem.*, 2004, **689**, 993–996.

(6) Z. Du, W. Li, X. Zhu, F. Xu, and Q. Shen, *J. Org. Chem.*, 2008, **73**, 8966–8972.

(7) T.-G. Ong, G. P. A. Yap and D. S. Richeson, *J. Am. Chem. Soc.*, 2003, **125**, 8100–8101.

(8) X. Zhu, Z. Du, F. Xu and Q. Shen, *J. Org. Chem.*, 2009, **74**, 6347–6349.

## 2) An alternative mechanism for the formation of guanidines

Zn(OTf)<sub>2</sub> acted as Lewis acid catalyst to activate a carbodiimide yielding the intermediate  $\text{RN}^{\oplus}\equiv\text{C}-\text{NR}-\text{Zn}^{\ominus}(\text{OTf})_2$  (**E**). Nucleophilic addition of an amine to **E** and proton transfer gave rise to the guanidine and regenerated Zn(OTf)<sub>2</sub>. see: N. Yamamoto and M. Isobe, *Chem. Lett.*, 1994, 2299–2302.

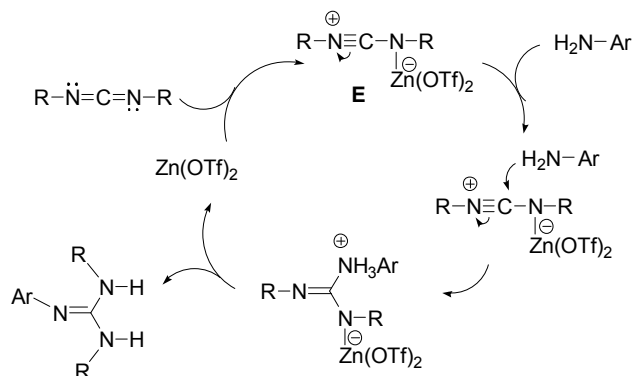

## 3) X-ray crystallographic studies for **20** and **22**

Crystals for X-ray analyses of **20** and **22** were obtained as described in the preparations. Data collections were performed at  $-100\text{ }^{\circ}\text{C}$  on a Rigaku SATURN 724+ CCD diffractometer, using graphite-monochromated Mo  $\text{K}\alpha$  radiation ( $\lambda = 0.71073\text{ \AA}$ ). The determination of crystal class and unit cell parameters was carried out by the CrystalClear (Rigaku Inc., 2008) program package. The raw frame data were processed using the CrystalClear (Rigaku Inc., 2008) to yield the reflection data file. The structure was solved by use of SHELXTL program. Refinement was performed on  $F^2$  anisotropically for all the non-hydrogen atoms by the full-matrix least-squares method. The hydrogen atoms were placed at the calculated positions and were included in the structure calculation without further refinement of the parameters. Crystal data, data collection and processing parameters for **20** and **22** were given only in Supporting Information. Crystallographic data (excluding structure factors) have been deposited with the Cambridge Crystallographic Data Centre as supplementary publication nos. CCDC-741356 (**20**), and CCDC-741355 (**22**). Copies of these data can be obtained free of charge from the Cambridge Crystallographic Data Centre via [www.ccdc.cam.ac.uk/data\\_request/cif](http://www.ccdc.cam.ac.uk/data_request/cif).

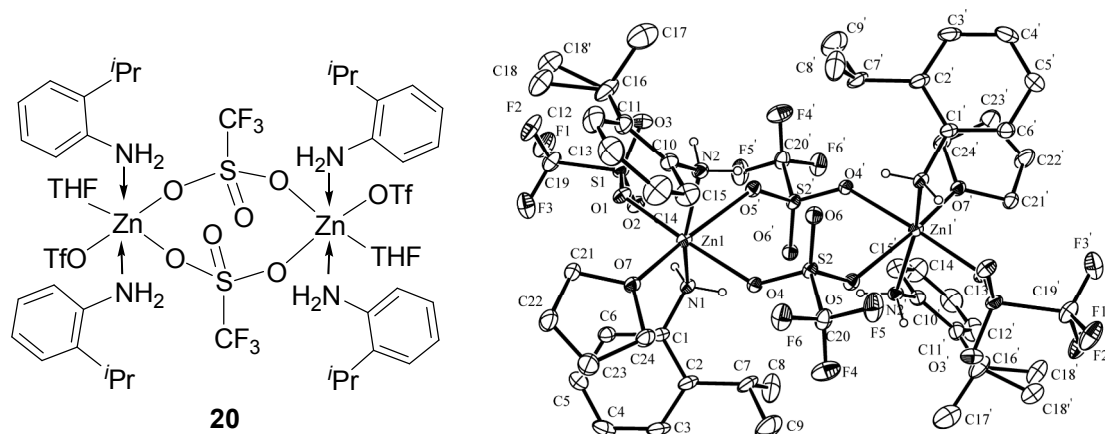

**SFig. 1** ORTEP drawing of **20** with 30% thermal ellipsoids. Hydrogen atoms, except those on the nitrogen atoms, are omitted for clarity.

**STable 1.** Crystal data and structure refinement for **20**.

|                                              |                                                                                                               |                     |
|----------------------------------------------|---------------------------------------------------------------------------------------------------------------|---------------------|
| Identification code                          | <b>20</b>                                                                                                     |                     |
| Empirical formula                            | C <sub>48</sub> H <sub>68</sub> F <sub>12</sub> N <sub>4</sub> O <sub>14</sub> S <sub>4</sub> Zn <sub>2</sub> |                     |
| Formula weight                               | 1412.04                                                                                                       |                     |
| Temperature                                  | 173(2) K                                                                                                      |                     |
| Wavelength                                   | 0.71073 Å                                                                                                     |                     |
| Crystal system                               | Tetragonal                                                                                                    |                     |
| Space group                                  | I4(1)/a                                                                                                       |                     |
| Unit cell dimensions                         | <i>a</i> = 35.199(5) Å                                                                                        | $\alpha = 90^\circ$ |
|                                              | <i>b</i> = 35.199(5) Å                                                                                        | $\beta = 90^\circ$  |
|                                              | <i>c</i> = 11.268(2) Å                                                                                        | $\gamma = 90^\circ$ |
| Volume                                       | 13960(4) Å <sup>3</sup>                                                                                       |                     |
| Z                                            | 8                                                                                                             |                     |
| Density (calculated)                         | 1.344 Mg/m <sup>3</sup>                                                                                       |                     |
| Absorption coefficient                       | 0.894 mm <sup>-1</sup>                                                                                        |                     |
| F(000)                                       | 5824                                                                                                          |                     |
| Crystal size                                 | 0.35 x 0.25 x 0.10 mm <sup>3</sup>                                                                            |                     |
| Theta range for data collection              | 1.16 to 25.00 °                                                                                               |                     |
| Index ranges                                 | -41 ≤ <i>h</i> ≤ 41, -41 ≤ <i>k</i> ≤ 41, -13 ≤ <i>l</i> ≤ 13                                                 |                     |
| Reflections collected                        | 62839                                                                                                         |                     |
| Independent reflections                      | 6130 [ <i>R</i> <sub>(int)</sub> = 0.0623]                                                                    |                     |
| Completeness to theta = 25.00 °              | 99.7 %                                                                                                        |                     |
| Absorption correction                        | Numerical                                                                                                     |                     |
| Max. and min. transmission                   | 0.9160 and 0.7450                                                                                             |                     |
| Refinement method                            | Full-matrix least-squares on F <sup>2</sup>                                                                   |                     |
| Data / restraints / parameters               | 6130 / 21 / 391                                                                                               |                     |
| Goodness-of-fit on F <sup>2</sup>            | 1.067                                                                                                         |                     |
| Final R indices [ <i>I</i> > 2σ( <i>I</i> )] | <i>R</i> <sub>1</sub> = 0.0644, <i>wR</i> <sub>2</sub> = 0.1956                                               |                     |
| R indices (all data)                         | <i>R</i> <sub>1</sub> = 0.0681, <i>wR</i> <sub>2</sub> = 0.1999                                               |                     |
| Largest diff. peak and hole                  | 0.649 and -0.693 e. Å <sup>-3</sup>                                                                           |                     |

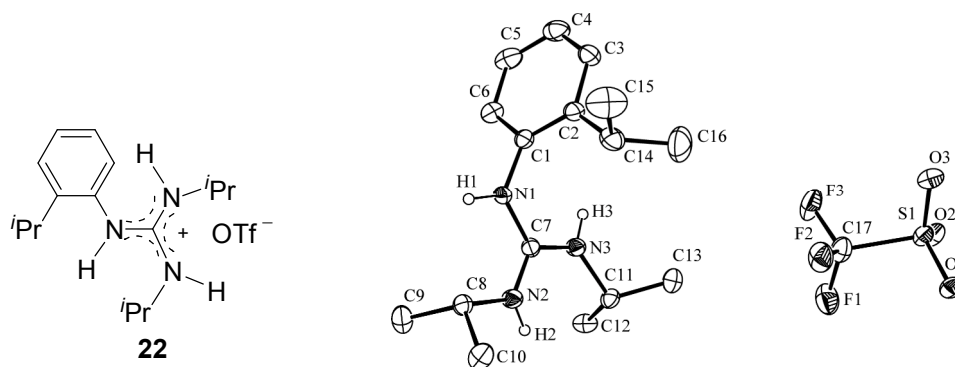

**SFig. 2** ORTEP drawing of **22** with 30% thermal ellipsoids. Hydrogen atoms, except those on the nitrogen atoms, are omitted for clarity.

**STable 2.** Crystal data and structure refinement for **22**.

|                                      |                                                                                                                                                      |
|--------------------------------------|------------------------------------------------------------------------------------------------------------------------------------------------------|
| Identification code                  | <b>22</b>                                                                                                                                            |
| Empirical formula                    | C <sub>17</sub> H <sub>28</sub> F <sub>3</sub> N <sub>3</sub> O <sub>3</sub> S                                                                       |
| Formula weight                       | 411.48                                                                                                                                               |
| Temperature                          | 173(2) K                                                                                                                                             |
| Wavelength                           | 0.71073 Å                                                                                                                                            |
| Crystal system, space group          | Orthorhombic, Pna2(1)                                                                                                                                |
| Unit cell dimensions                 | $a = 16.419(3) \text{ \AA}$ $\alpha = 90^\circ$<br>$b = 12.458(3) \text{ \AA}$ $\beta = 90^\circ$<br>$c = 10.520(2) \text{ \AA}$ $\gamma = 90^\circ$ |
| Volume                               | 2151.8(7) Å <sup>3</sup>                                                                                                                             |
| Z, Calculated density                | 4, 1.270 Mg/m <sup>3</sup>                                                                                                                           |
| Absorption coefficient               | 0.196 mm <sup>-1</sup>                                                                                                                               |
| F(0 0 0)                             | 872                                                                                                                                                  |
| Crystal size                         | 0.30 x 0.29 x 0.13 mm                                                                                                                                |
| Theta range for data collection      | 2.82 to 27.49 °.                                                                                                                                     |
| Limiting indices                     | -14 ≤ h ≤ 21, -16 ≤ k ≤ 16, -13 ≤ l ≤ 12                                                                                                             |
| Reflections collected / unique       | 16883 / 4604 [ $R_{\text{int}} = 0.0369$ ]                                                                                                           |
| Completeness to theta = 27.49 °      | 99.7 %                                                                                                                                               |
| Absorption correction                | Numerical                                                                                                                                            |
| Max. and min. transmission           | 0.9749 and 0.9435                                                                                                                                    |
| Refinement method                    | Full-matrix least-squares on F <sup>2</sup>                                                                                                          |
| Data / restraints / parameters       | 4604 / 1 / 244                                                                                                                                       |
| Goodness-of-fit on F <sup>2</sup>    | 1.082                                                                                                                                                |
| Final R indices [ $I > 2\sigma(I)$ ] | $R_1 = 0.0441$ , $wR_2 = 0.0945$                                                                                                                     |
| R indices (all data)                 | $R_1 = 0.0482$ , $wR_2 = 0.0977$                                                                                                                     |
| Absolute structure parameter         | 0.00(8)                                                                                                                                              |
| Largest diff. peak and hole          | 0.185 and -0.200 e. Å <sup>-3</sup>                                                                                                                  |

## 4 ) Copies of $^1\text{H}$ NMR and $^{13}\text{C}$ NMR spectra of all new compounds

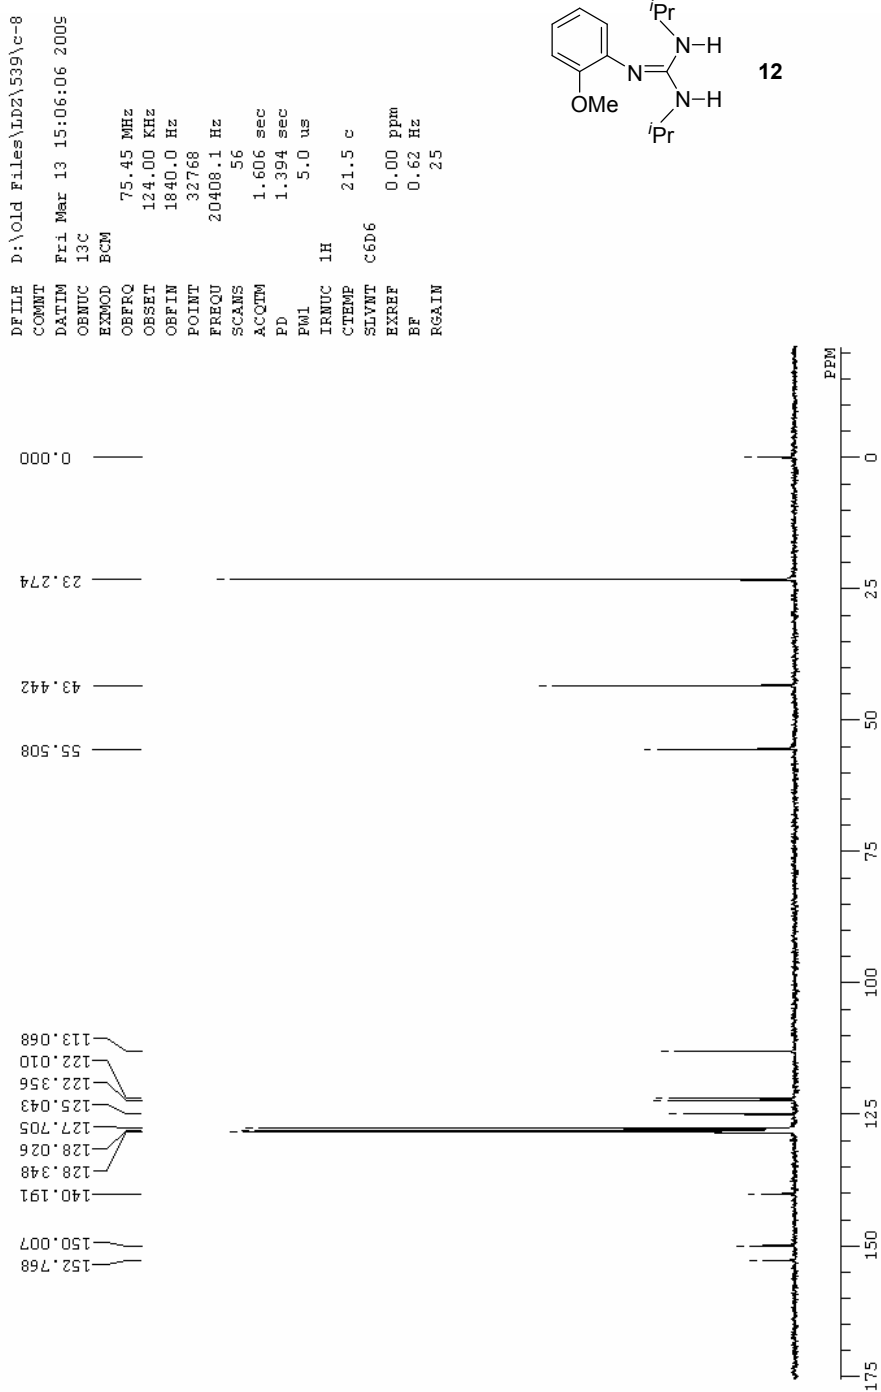

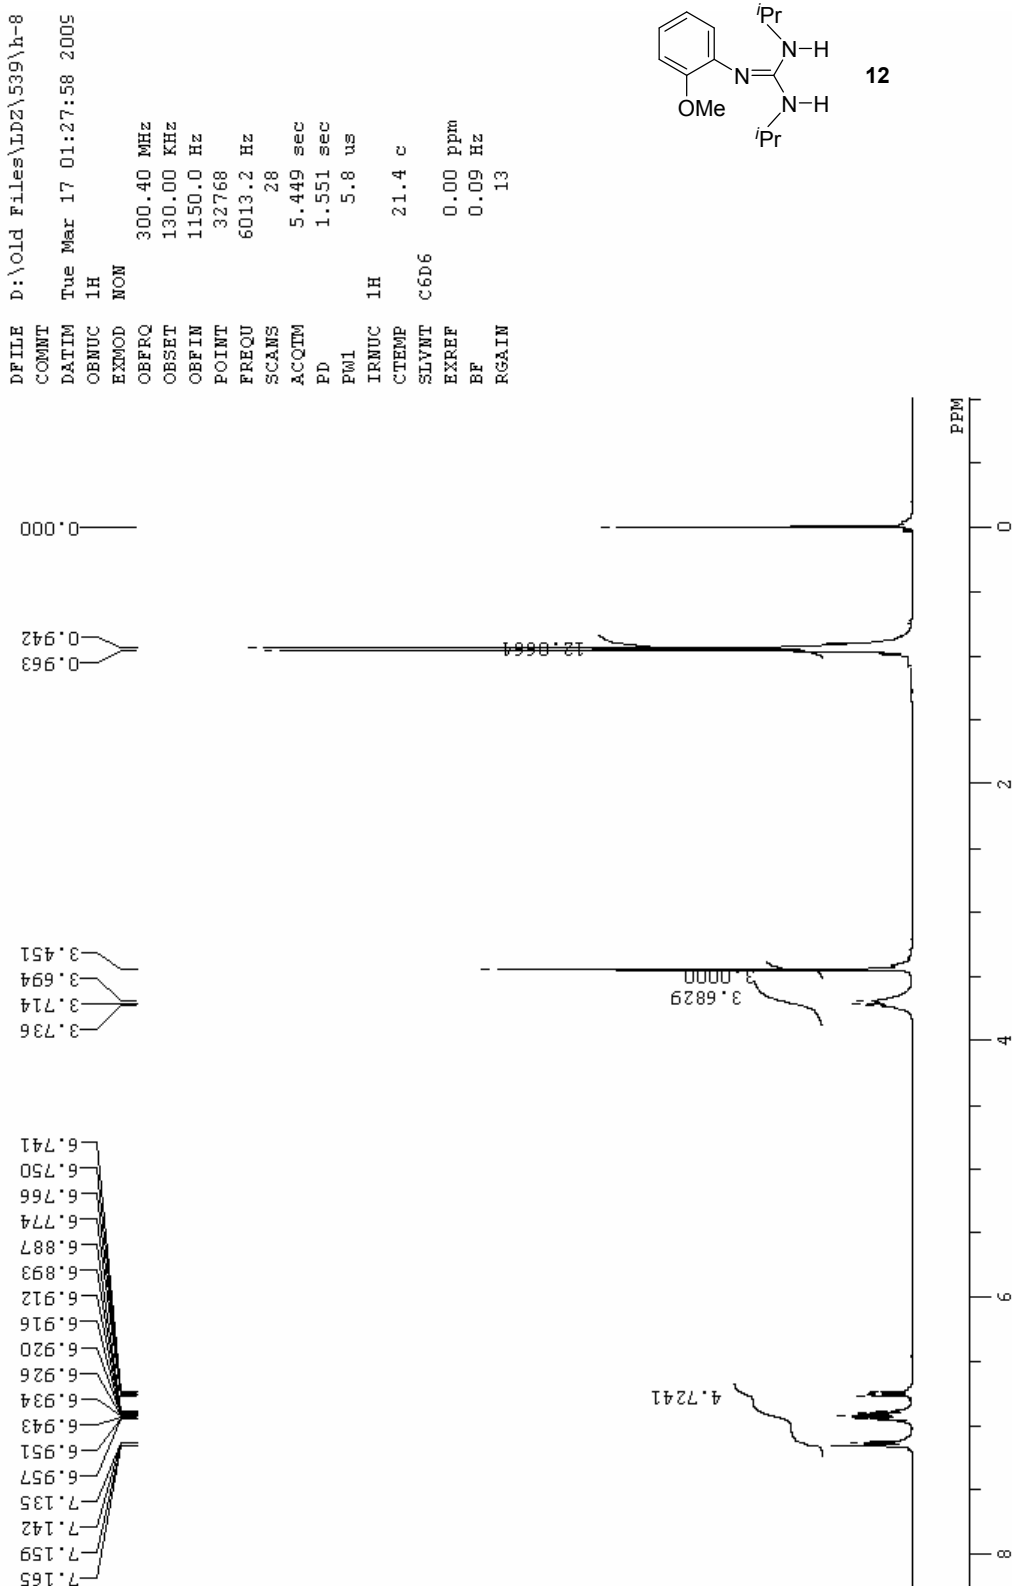



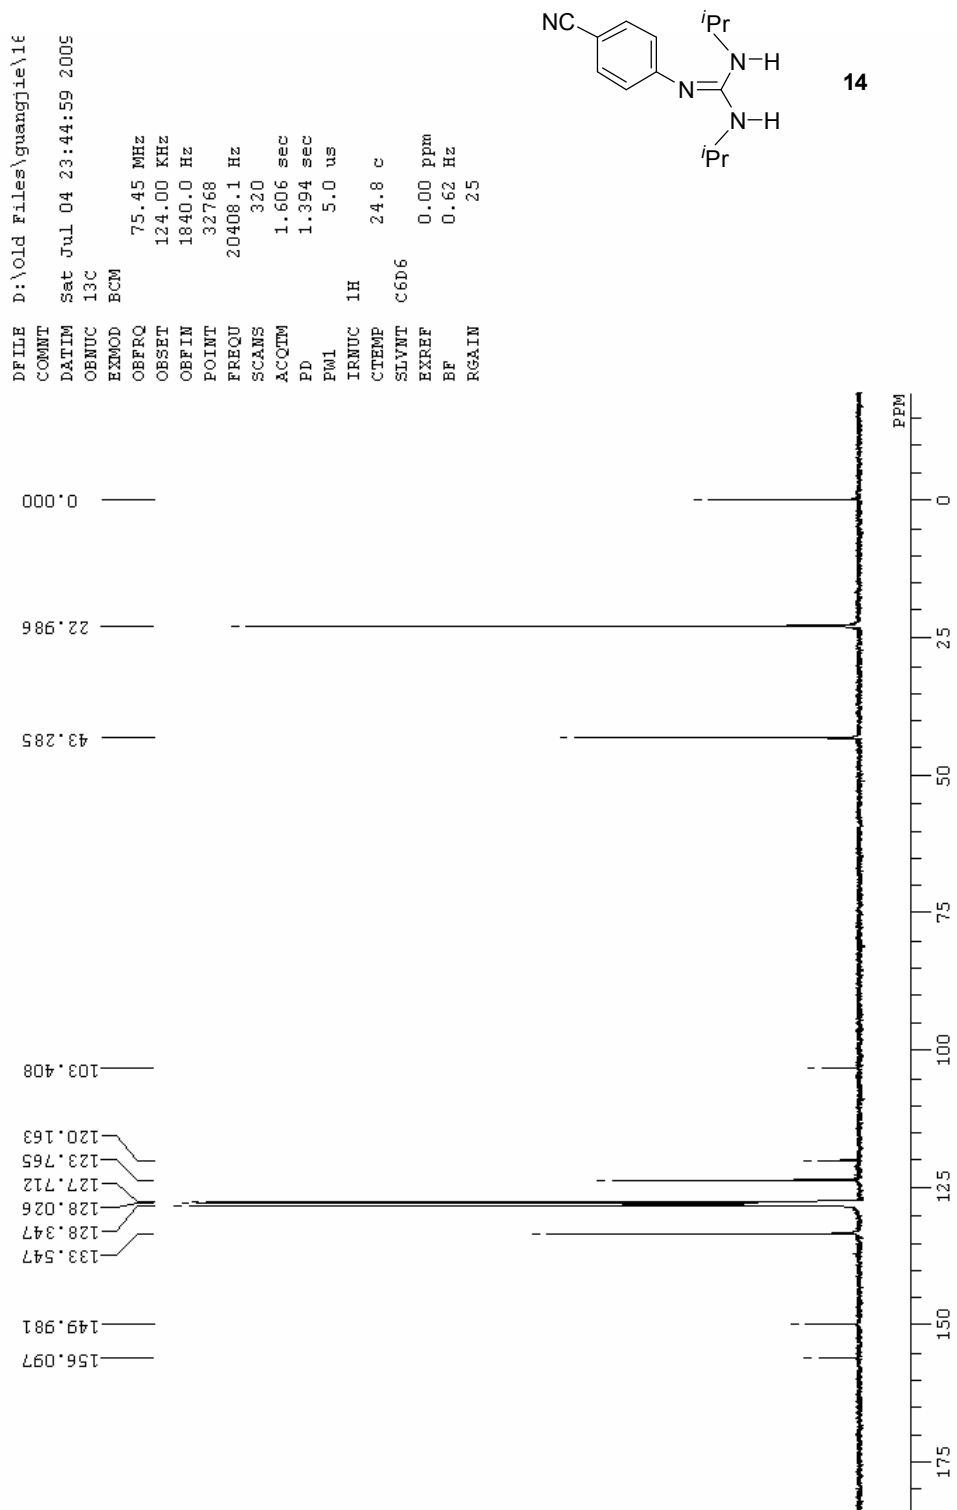

D:\old Files\guangjie\1f  
COMMT  
DATIM Sat Jul 04 23:28:06 2005  
OBNUC 1H  
EXMOD NOM  
OBFRQ 300.40 MHz  
OBSET 130.00 KHz  
OBFIN 1150.0 Hz  
POINT 32768  
FREQU 6013.2 Hz  
SCANS 16  
ACQTM 5.449 sec  
PD 1.551 sec  
PWL 5.8 us  
IRNUC 1H  
CTEMP 24.1 c  
SIVNT C6D6  
EXREF 0.00 ppm  
BF 0.09 Hz  
RGAIN 15

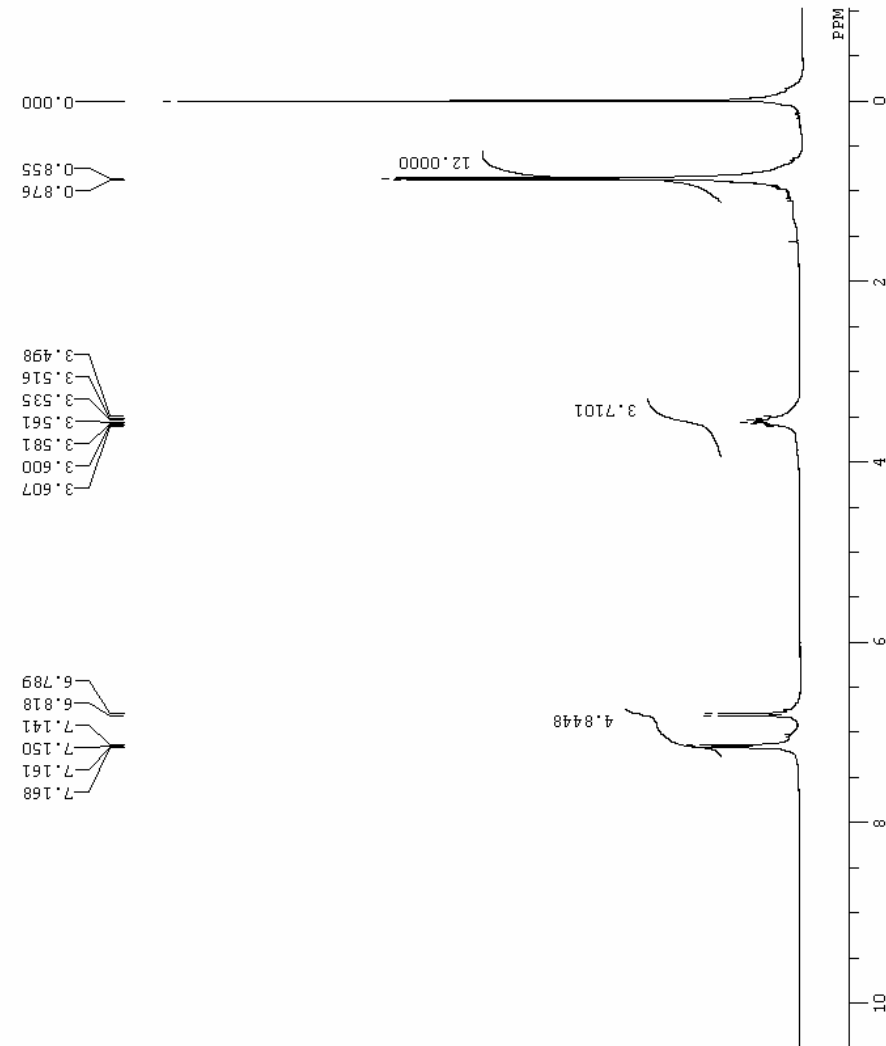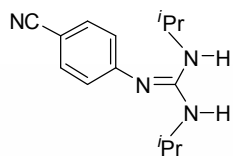

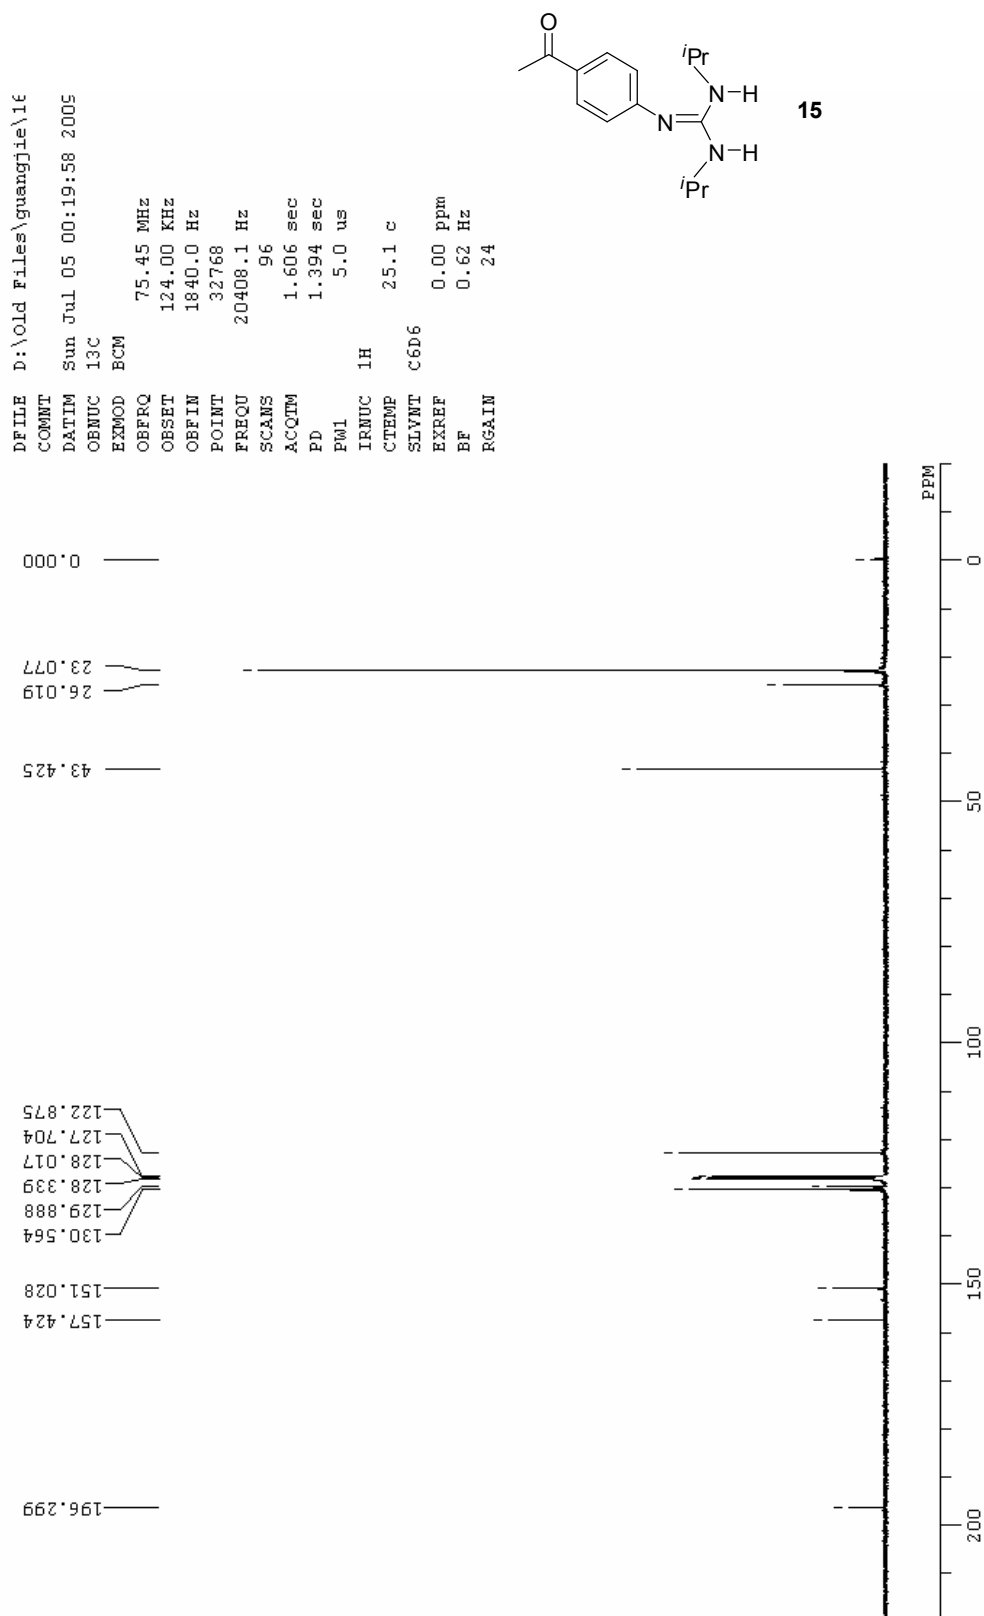

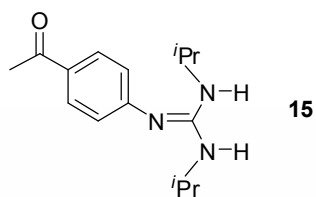

D:\Old Files\guangjie\1f  
 COMPT Sun Jul 05 00:23:41 2005  
 DATIM  
 OBNUC 1H  
 EXMOD NOM

OBFRQ 300.40 MHz  
 OBSET 130.00 KHz  
 OBFIN 1150.0 Hz  
 POINT 32768  
 FREQU 6013.2 Hz  
 SCANS 8  
 ACQTM 5.449 sec  
 PD 1.551 sec  
 PM1 5.8 us  
 IRNUC 1H  
 CTEMP 24.8 c  
 SLVNT C6D6  
 EXREF 0.00 ppm  
 BF 0.09 Hz  
 RGAIN 12

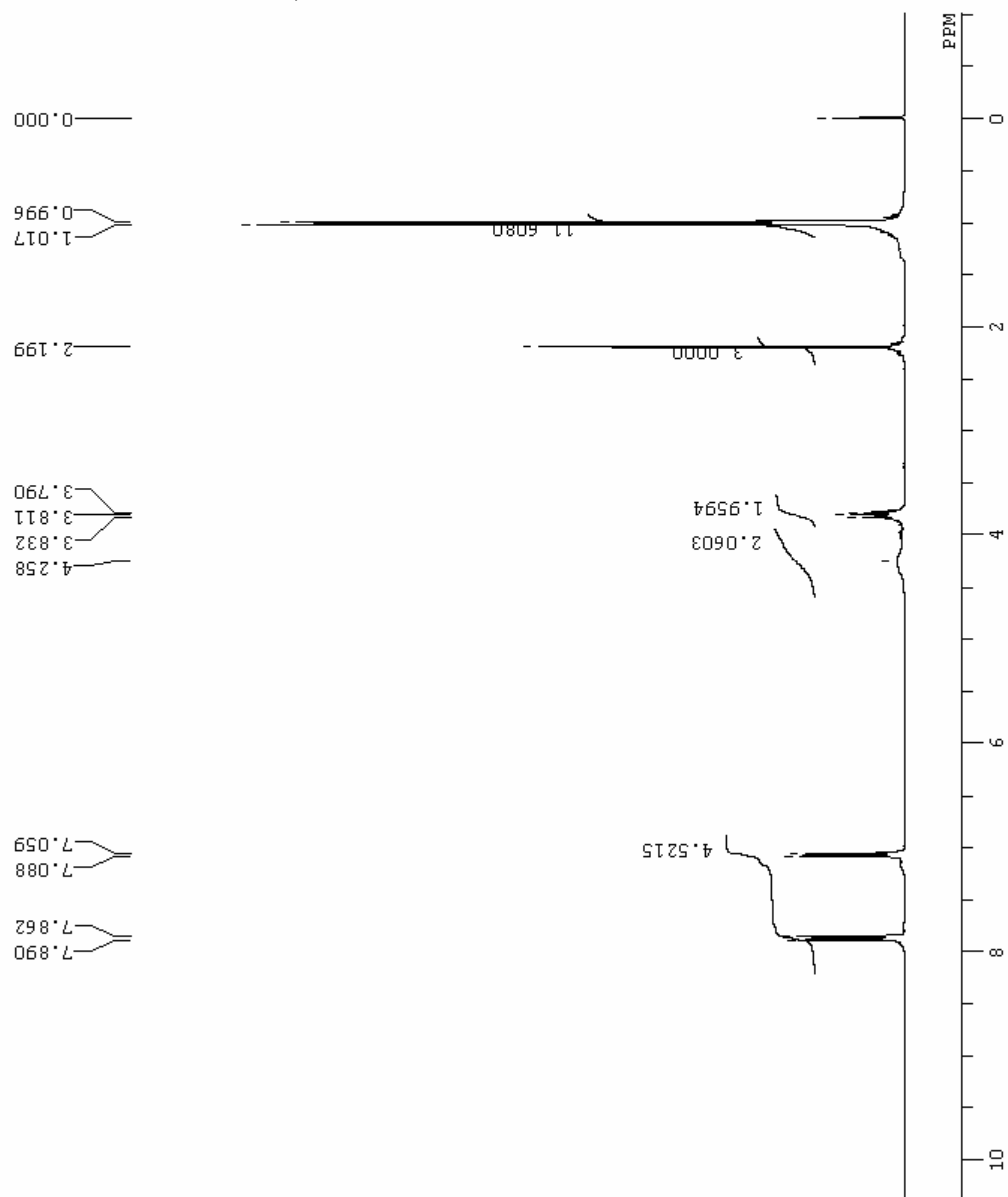

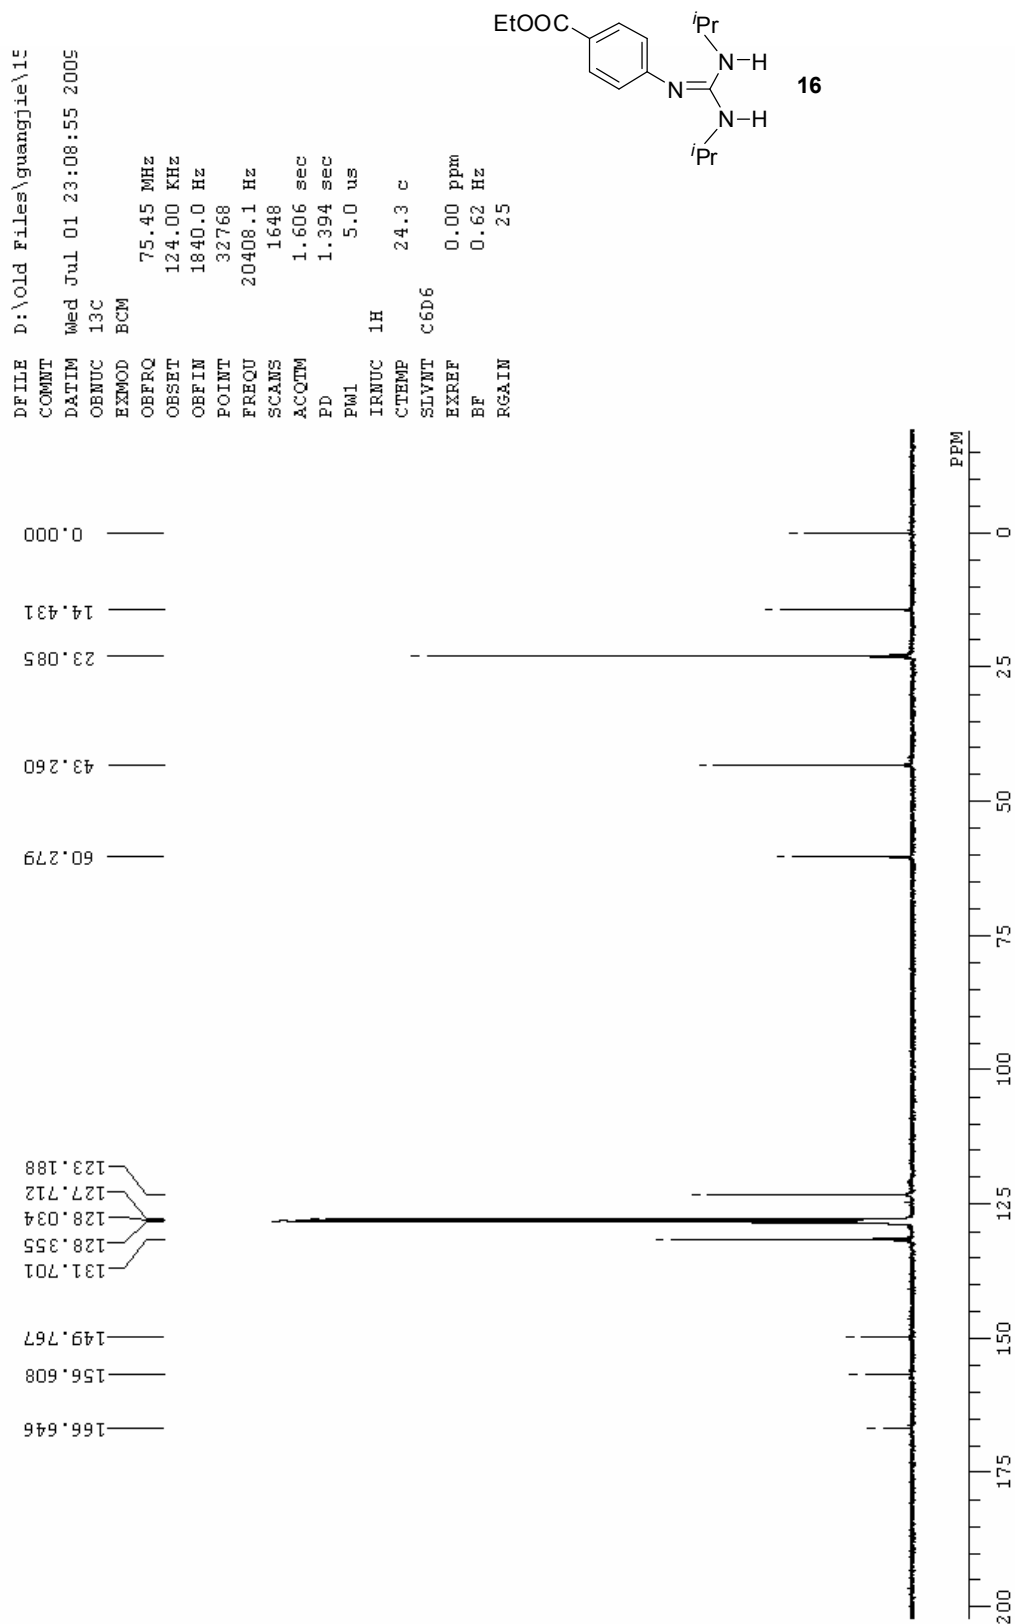

D:\old Files\guangjie\15  
COMMIT  
DATEM Med Jul 01 23:18:05 2005  
OBRUC 1H  
EXMOD NON  
OBFREQ 300.40 MHz  
OBSET 130.00 KHz  
OBFIN 1150.0 Hz  
POINT 32768  
FREQ 6013.2 Hz  
SCANS 8  
ACQTM 5.449 sec  
PD 1.551 sec  
PWI 5.8 us  
IRMUC 1H  
CTEMP 23.9 c  
SLVNT C6D6  
EXREF 0.00 ppm  
BF 0.09 Hz  
RGAIN 17

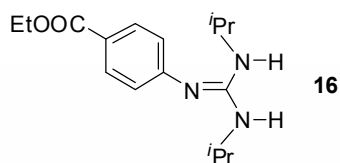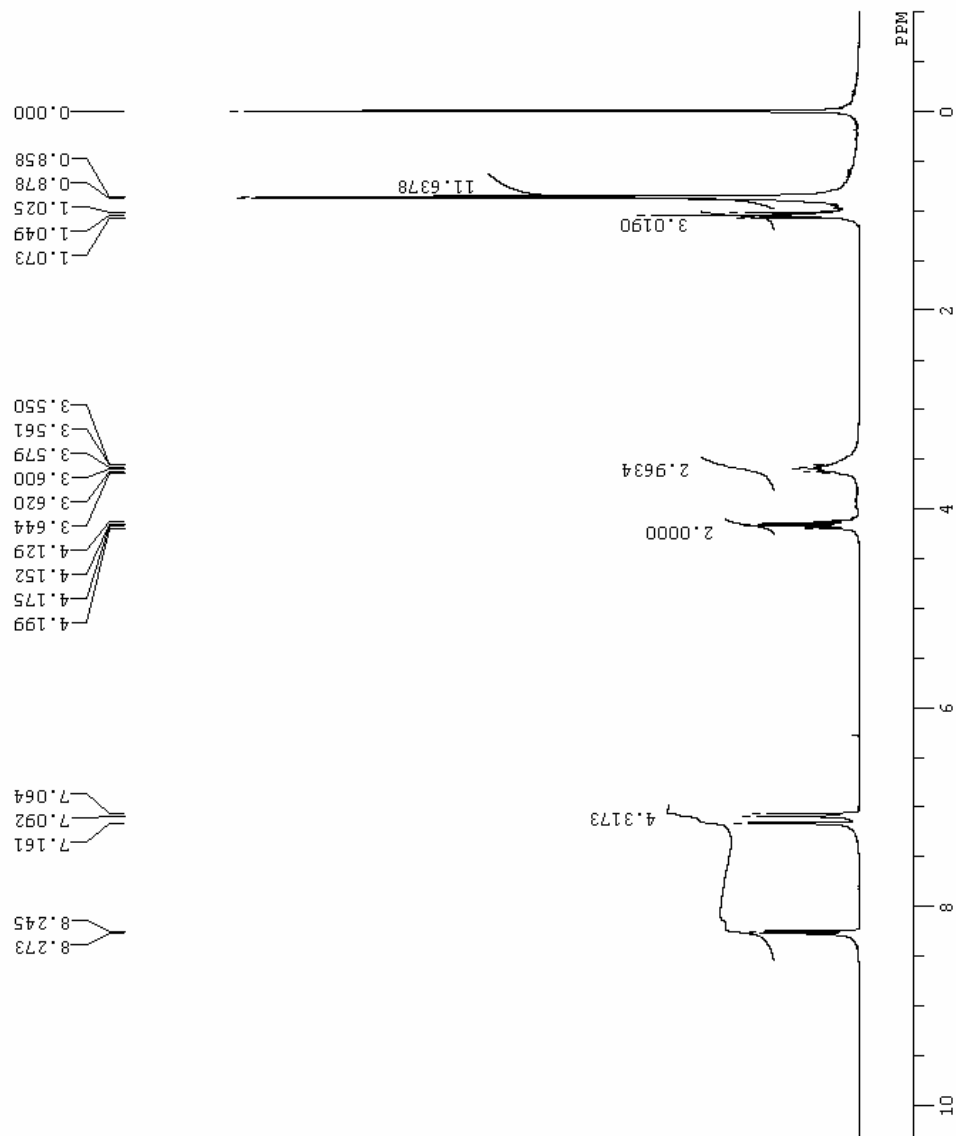

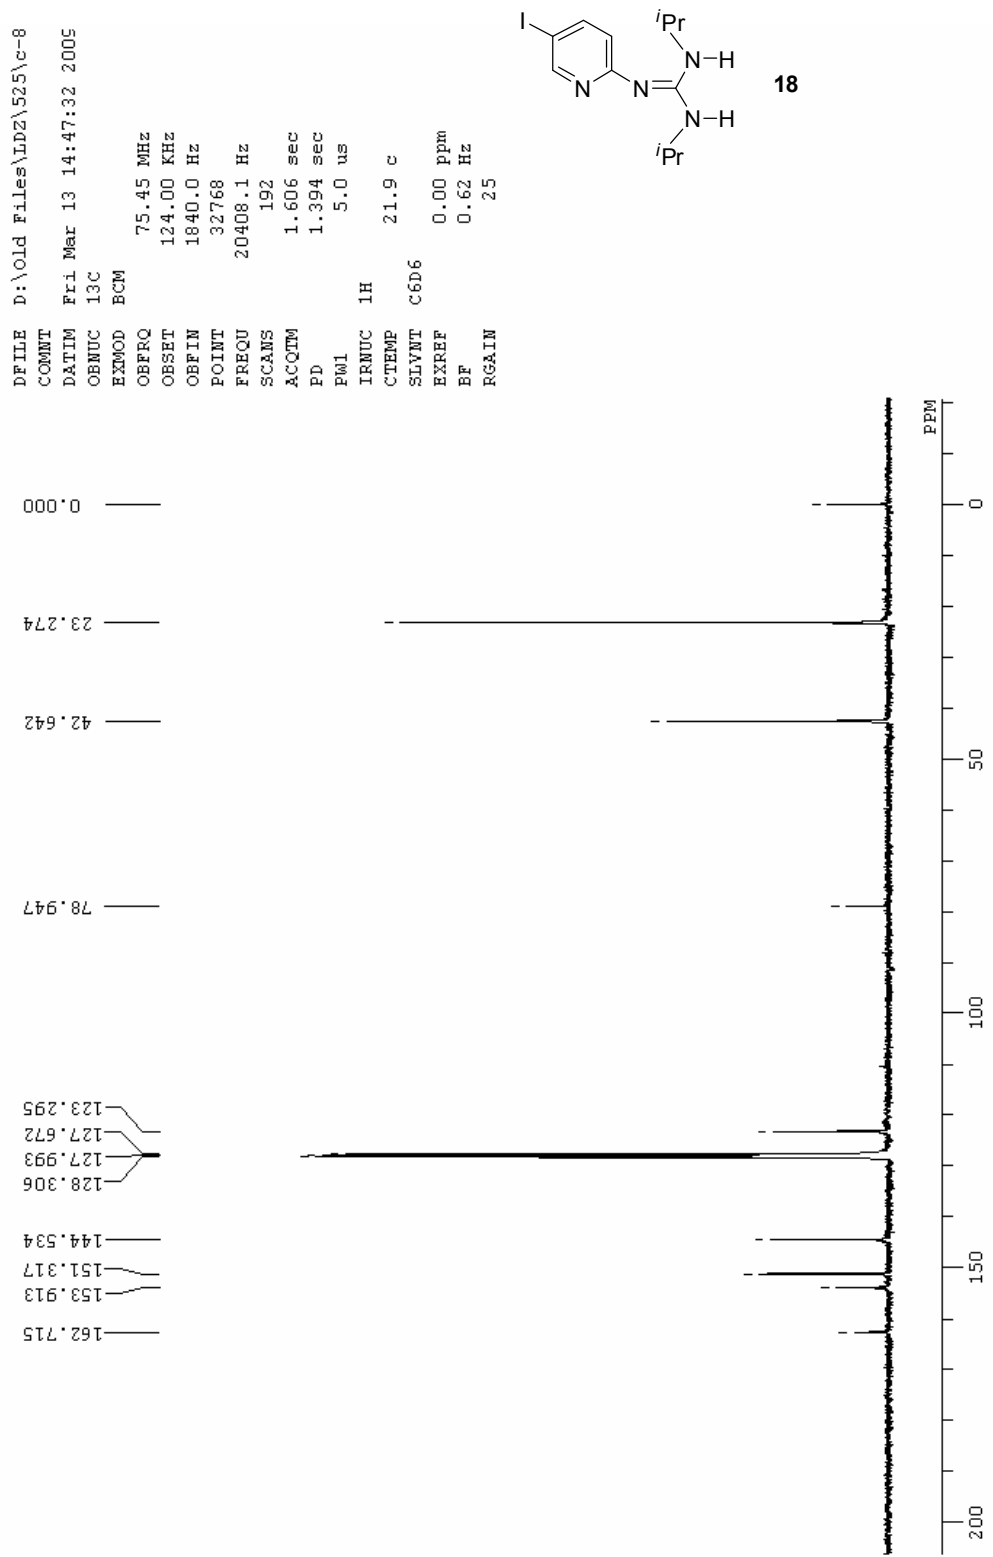

FILE D:\Old Files\LDZ\525\h-8  
 COMMENT  
 DATIM Tue Mar 17 01:46:48 2005  
 OBNUC 1H  
 EXMOD WCN  
 OFFRQ 300.40 MHz  
 OBSET 130.00 KHz  
 OFFIN 1150.0 Hz  
 POINT 32768  
 FREQU 6013.2 Hz  
 SCANS 56  
 ACQTM 5.449 sec  
 PD 1.551 sec  
 Pw1 5.8 us  
 IRNUC 1H  
 CTEMP 21.4 c  
 SLVNT C6D6  
 EXREF 0.00 ppm  
 BF 0.09 Hz  
 RGAIN 14

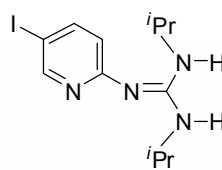

18

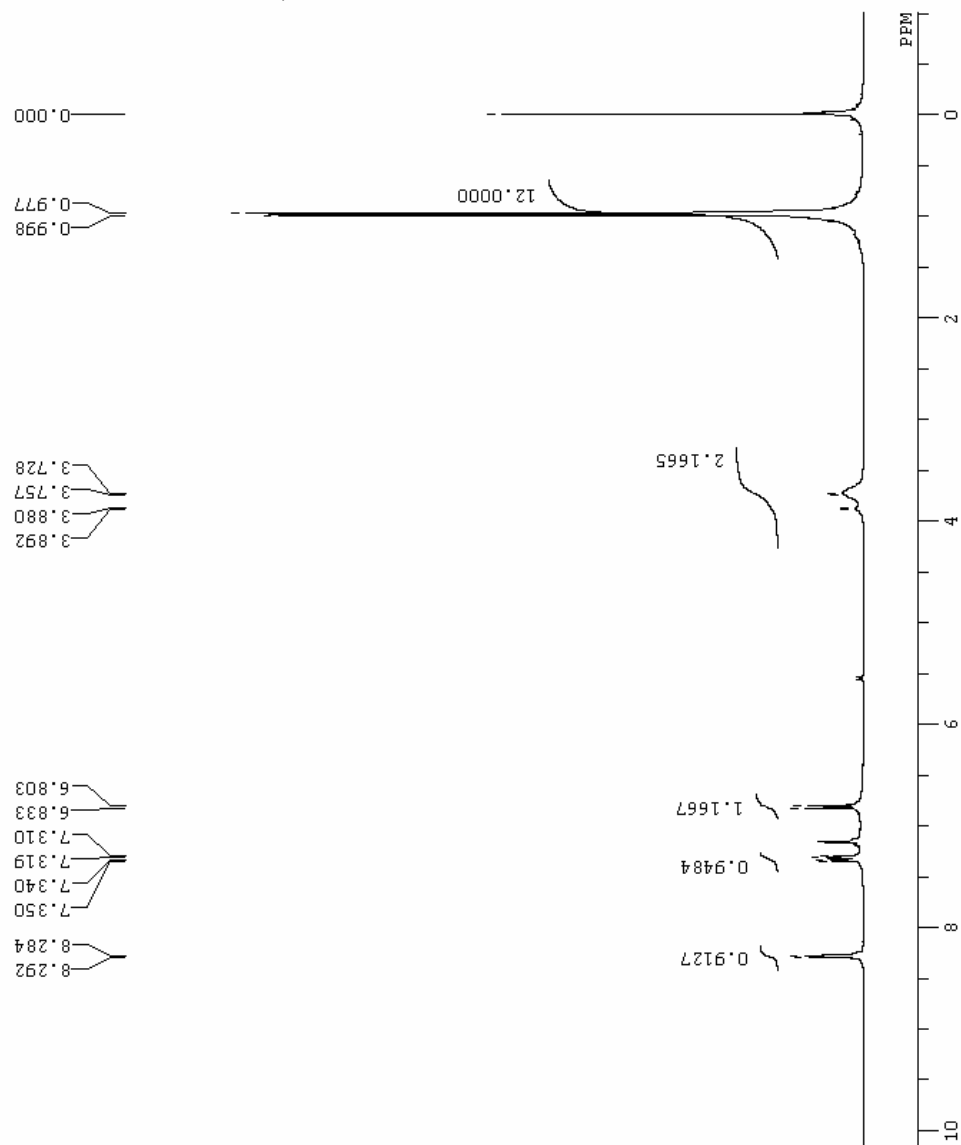



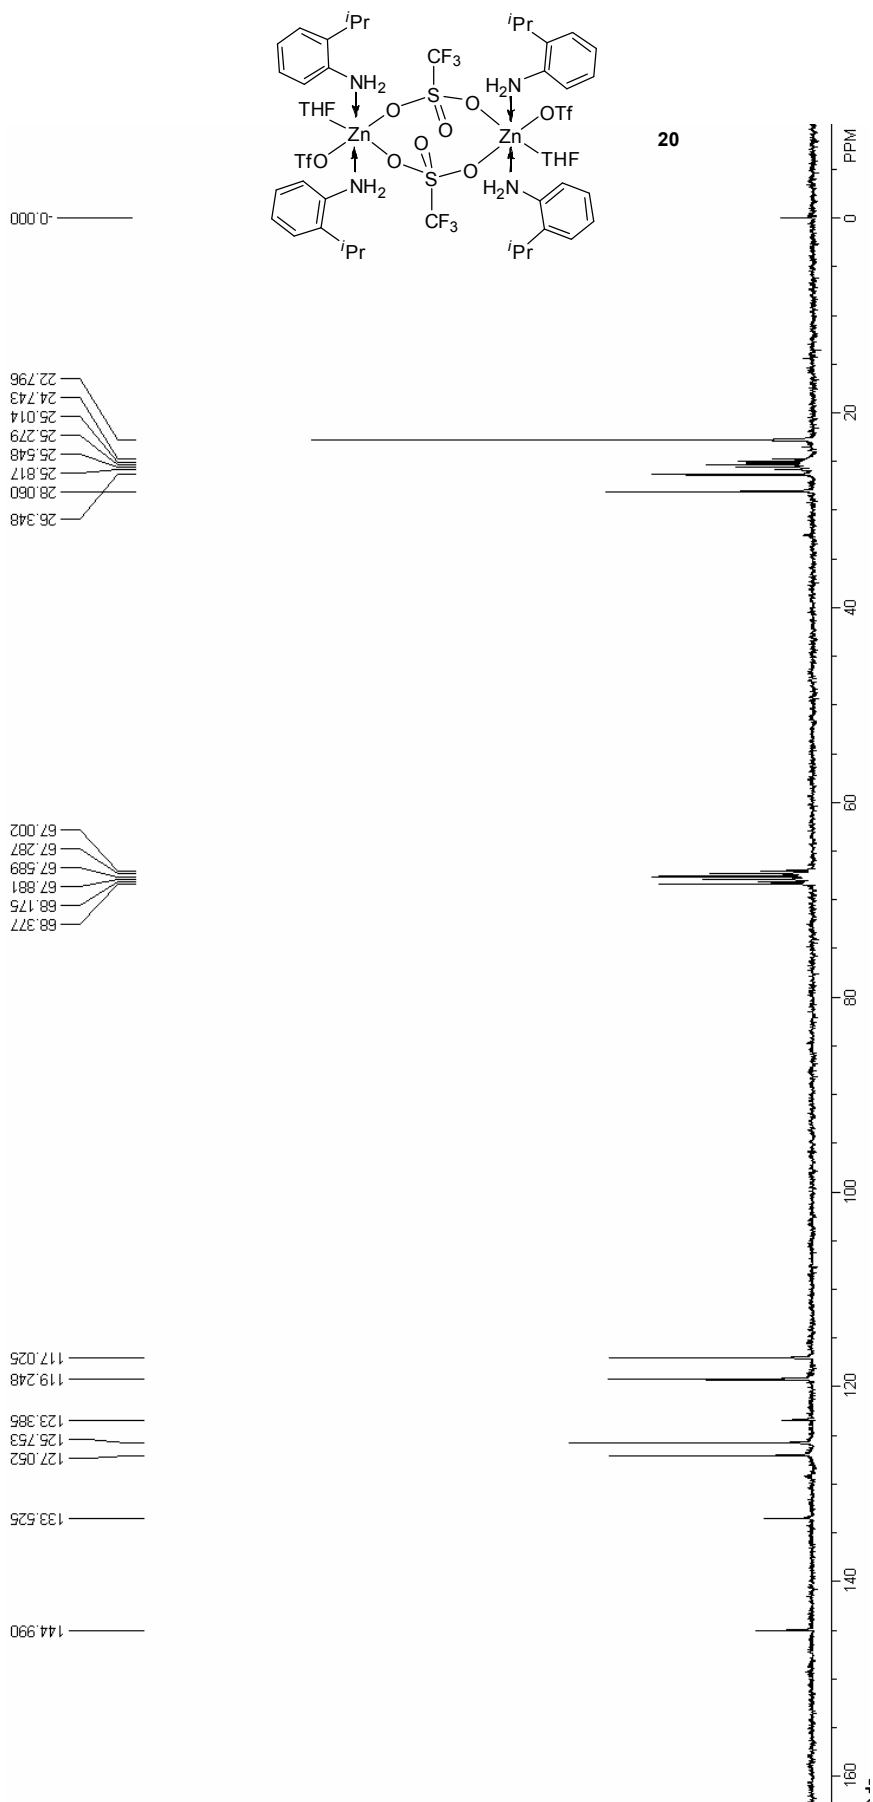

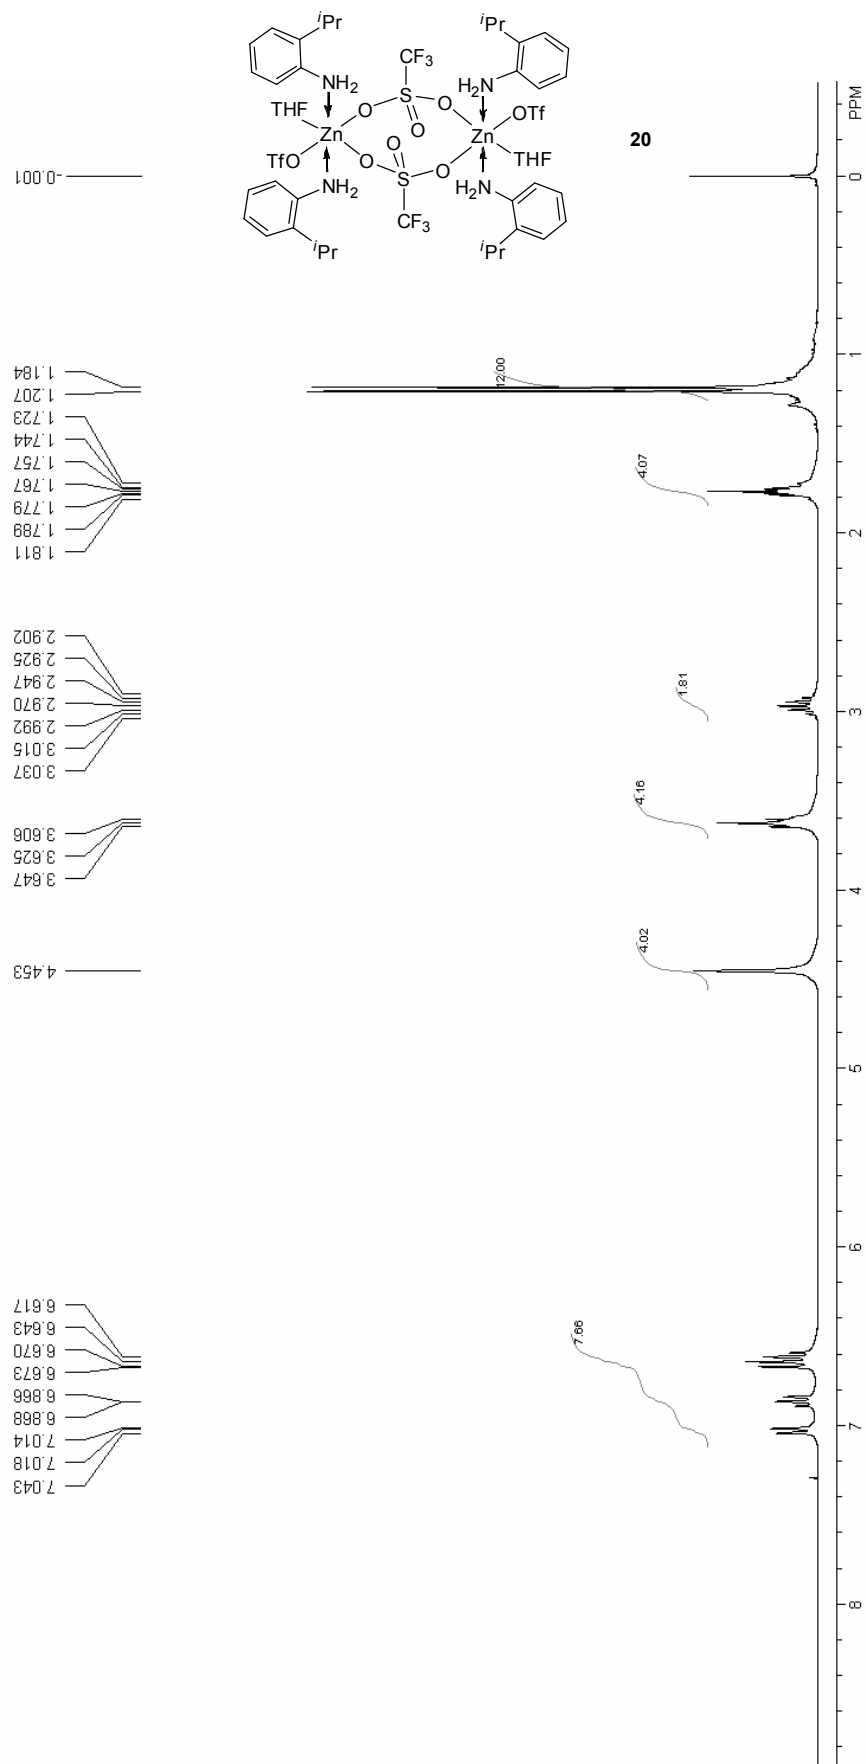

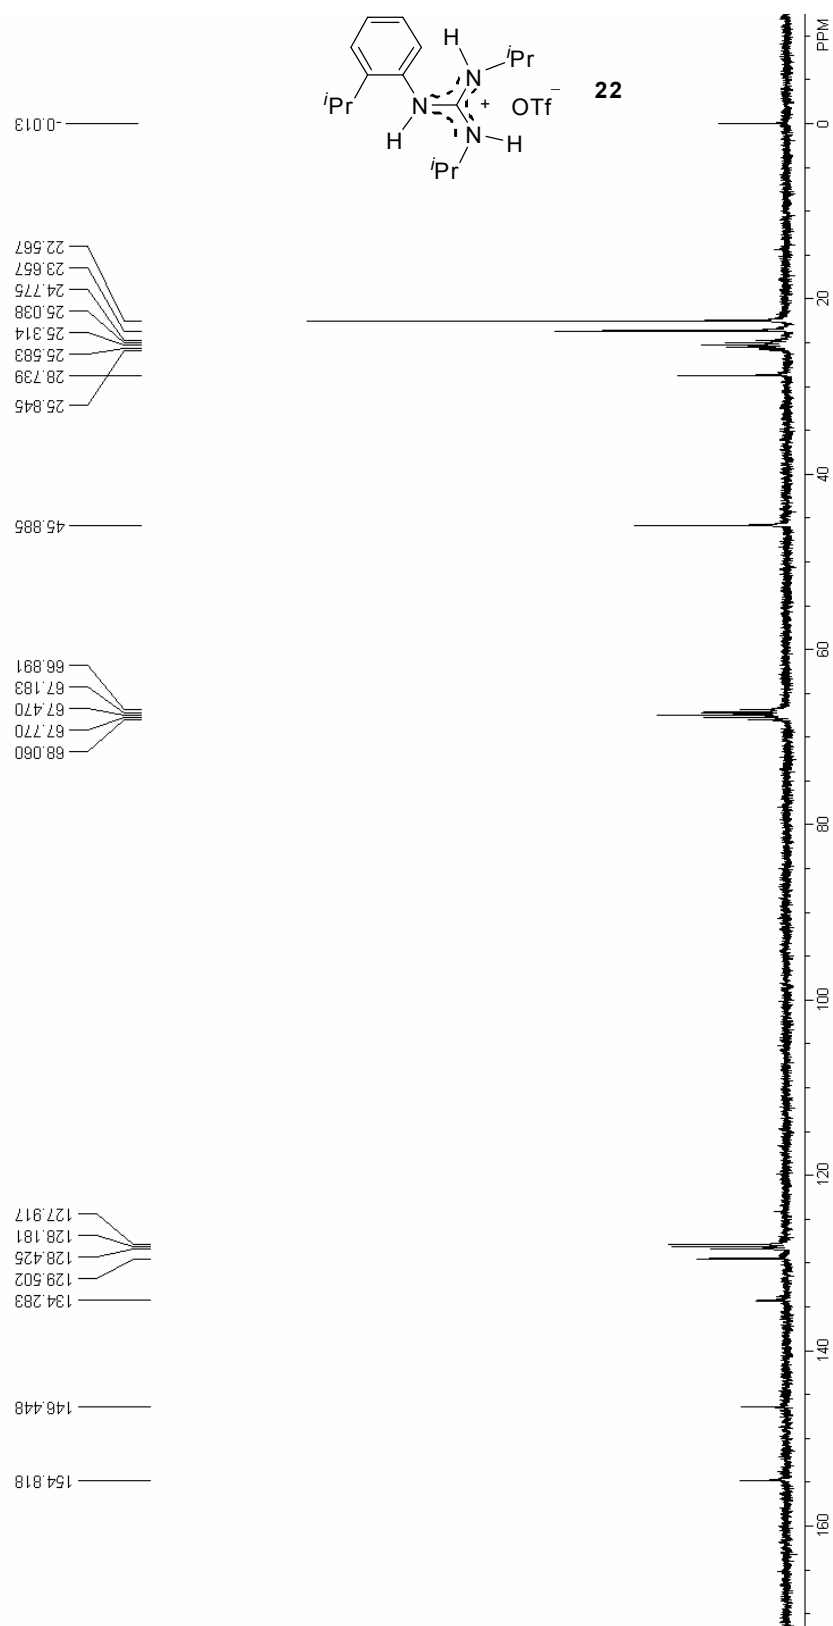

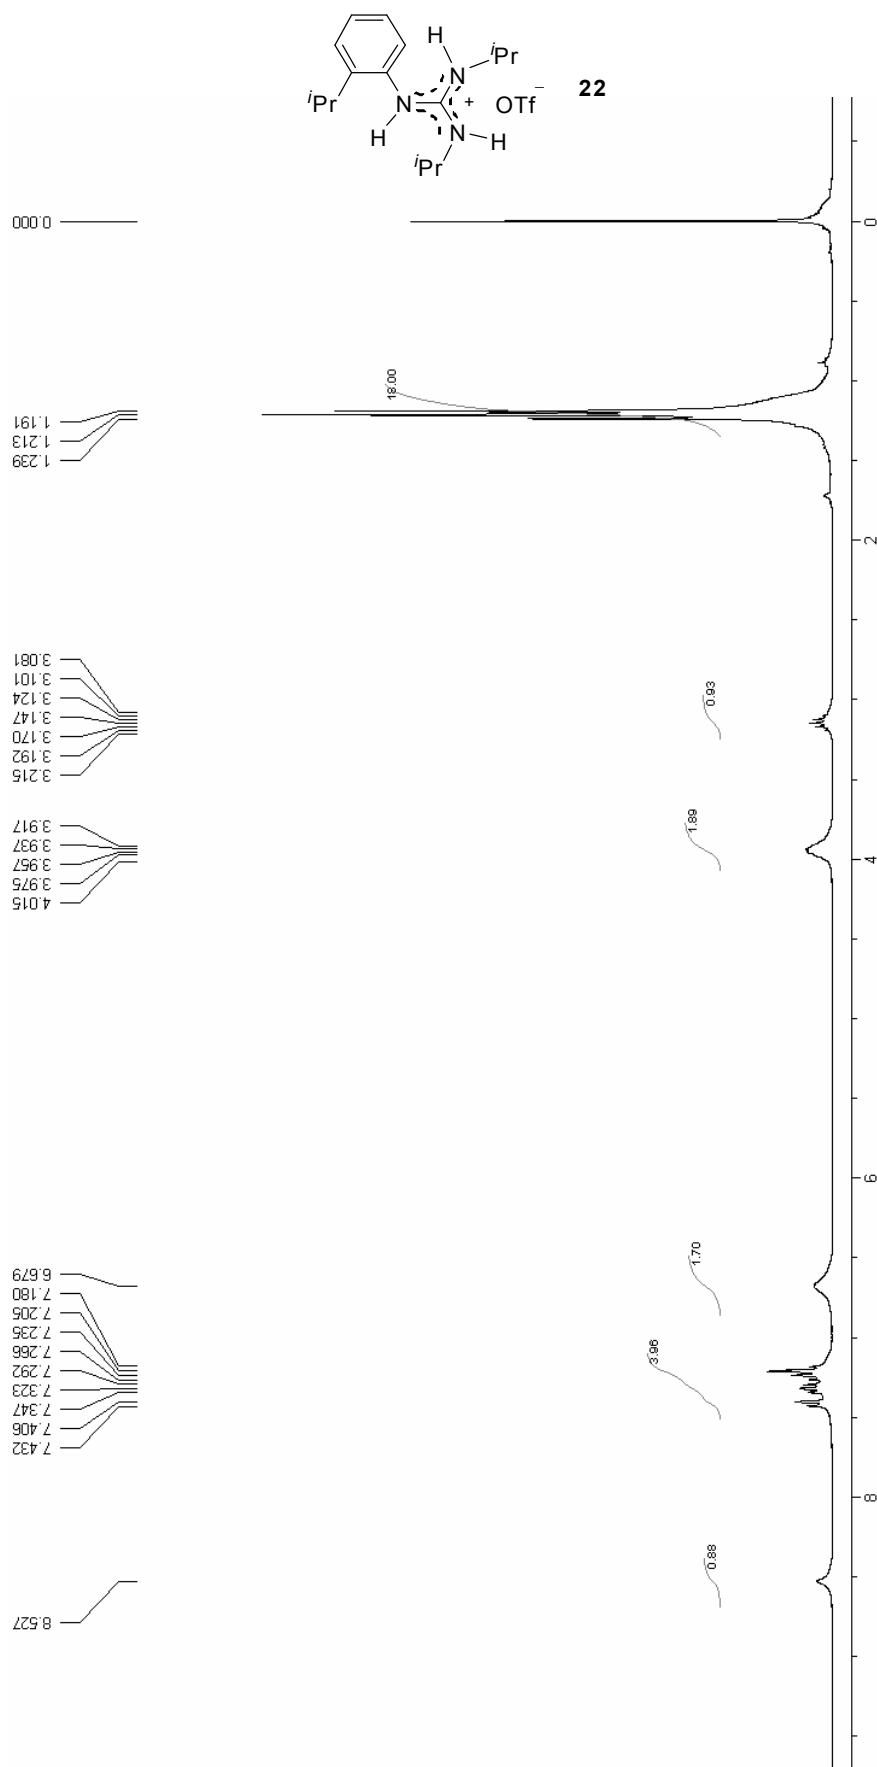

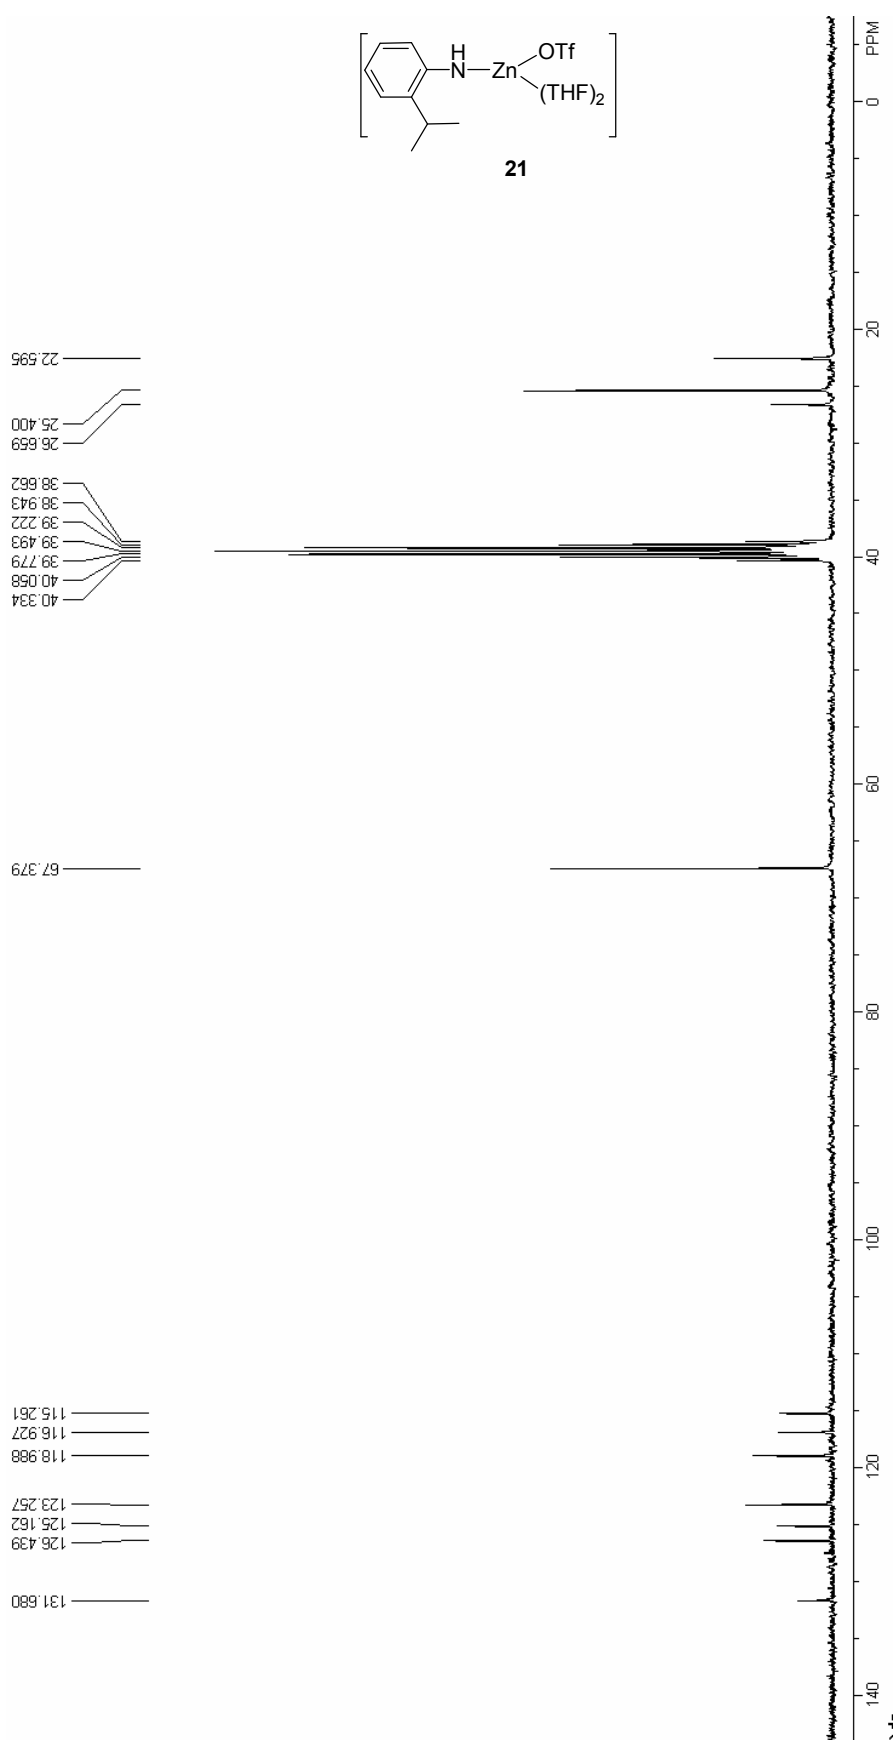

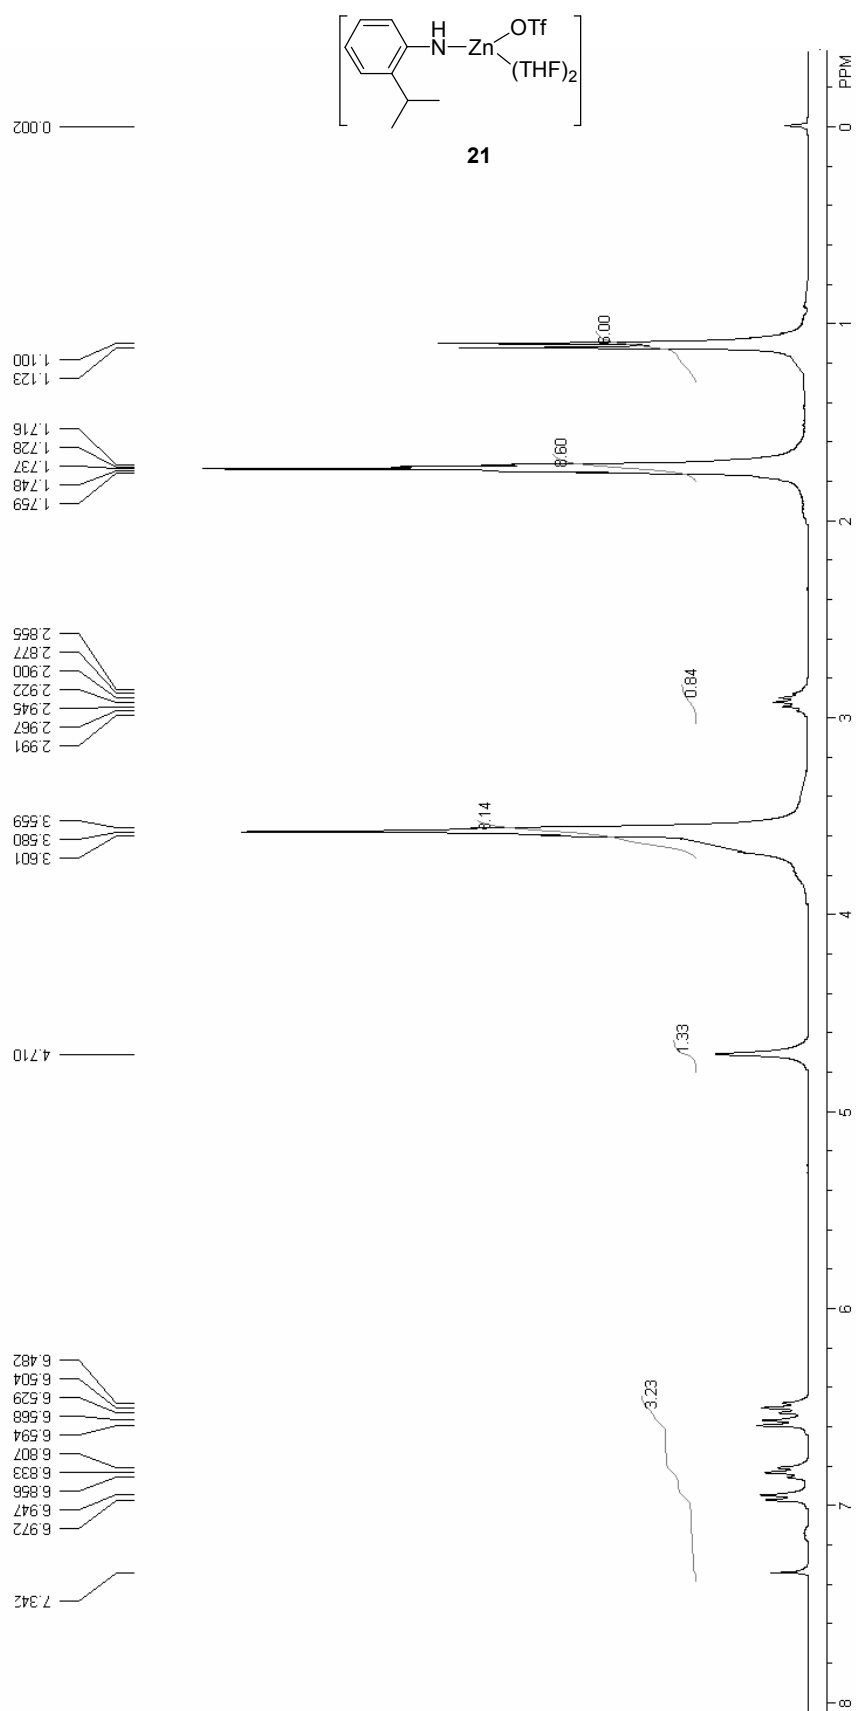

Supplement: b923249b.pdf [file b923249b.pdf]
